# Supplementary material for: Neighbor-friendly autonomous power control in wireless heterogeneous networks
Source: Springer Nature journal article supplement (doi:10.1186/1687-1499-2014-175), 2014-10-23

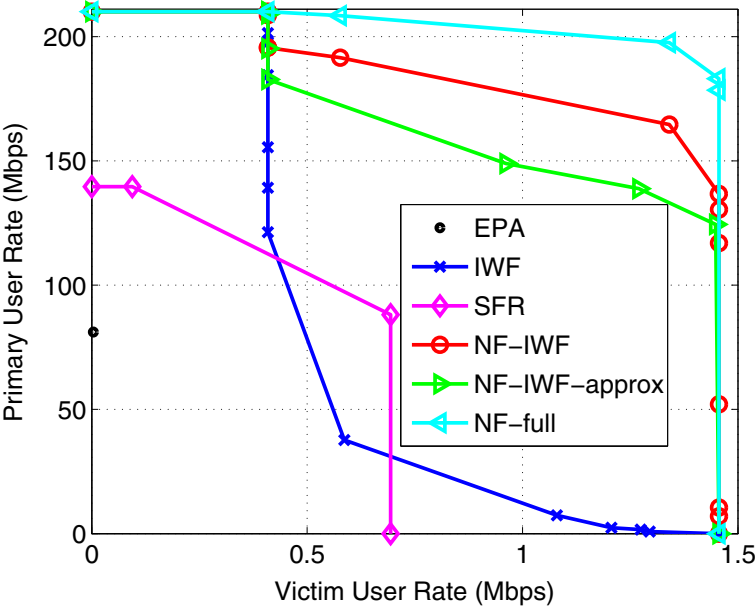

Supplement: 13638_2014_1066_MOESM13_ESM.pdf [file 13638_2014_1066_MOESM13_ESM.pdf]
